# Supplementary material for: Effects of Vitamin D Supplementation on CD4+ T Cell Subsets and mTOR Signaling Pathway in High-Fat-Diet-Induced Obese Mice
Source: Nutrients. 2021 Feb 28;13(3):796. doi: 10.3390/nu13030796 (PMC7997284; doi:10.3390/nu13030796)
Supplement: Supplementary file 1 [file nutrients-13-00796-s001.pdf]

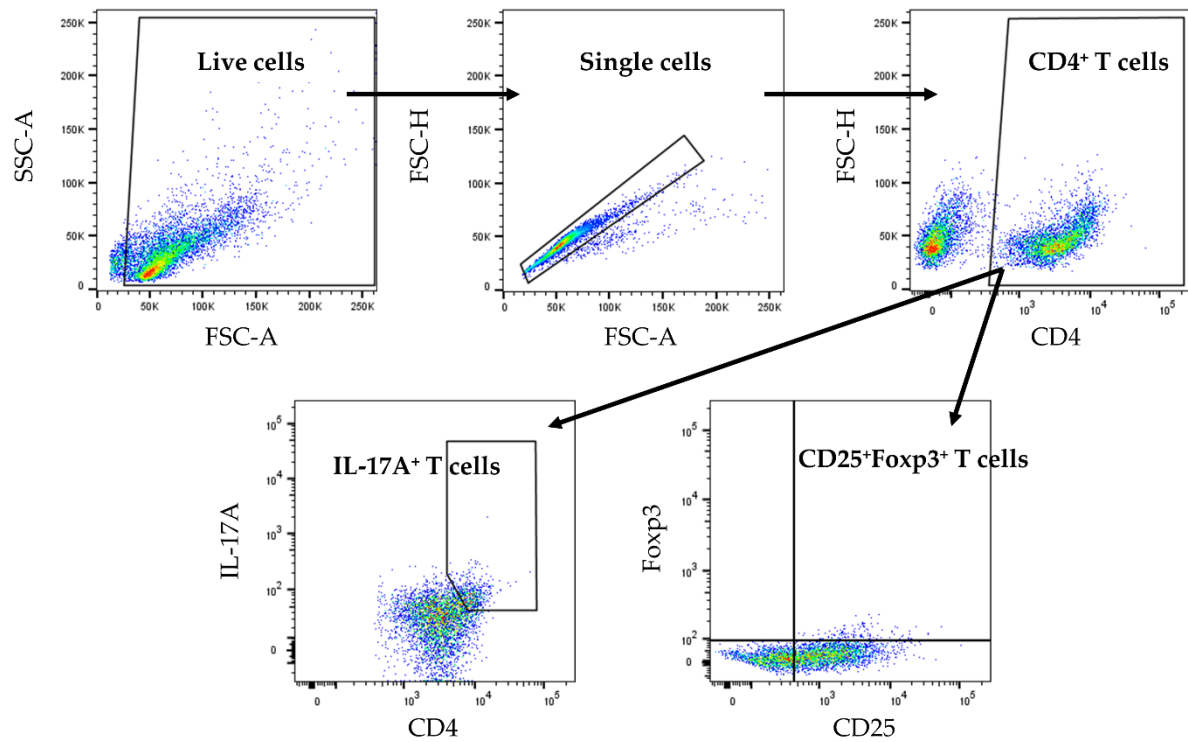

**Figure S1.** Gating strategy for analysis of CD4<sup>+</sup>IL-17<sup>+</sup> T cells and CD4<sup>+</sup>CD25<sup>+</sup>Foxp3<sup>+</sup> T cells.

Cells were gated based on size using FSC-A and SSC-A to eliminate dead cells and debris. Single cells were gated using FSC-A and FSC-H. CD4<sup>+</sup> T cells were selected for further analysis. Subsequently, CD4<sup>+</sup> T cells were followed by examination of expression of IL-17 PerCP-Cy<sup>TM</sup>5.5 and double expression of CD25 PE and Foxp3 Alexa Fluor 488.
